# Supplementary material for: Improving Maneuver Strategy in Air Combat by Alternate Freeze Games with a Deep Reinforcement Learning Algorithm
Source: Hindawi journal article supplement (doi:10.1155/2020/7180639), 2020-06-30
Supplement: f1 [file 7180639.f1.zip]

Archive with 33 entries (27 files):
- 7180639.f1/Supplementary Materials/
- 7180639.f1/Supplementary Materials/Aircraft Dynamics.pdf
- 7180639.f1/Supplementary Materials/code/
- 7180639.f1/Supplementary Materials/code/.idea/
- 7180639.f1/Supplementary Materials/code/.idea/code.iml
- 7180639.f1/Supplementary Materials/code/.idea/inspectionProfiles/
- 7180639.f1/Supplementary Materials/code/.idea/inspectionProfiles/profiles_settings.xml
- 7180639.f1/Supplementary Materials/code/.idea/misc.xml
- 7180639.f1/Supplementary Materials/code/.idea/modules.xml
- 7180639.f1/Supplementary Materials/code/.idea/workspace.xml
- 7180639.f1/Supplementary Materials/code/__pycache__/
- 7180639.f1/Supplementary Materials/code/__pycache__/Agent.cpython-36.pyc
- 7180639.f1/Supplementary Materials/code/__pycache__/Aircombat_env.cpython-36.pyc
- 7180639.f1/Supplementary Materials/code/Agent.py
- 7180639.f1/Supplementary Materials/code/Aircombat_env.py
- 7180639.f1/Supplementary Materials/code/blue_saved_networks/
- 7180639.f1/Supplementary Materials/code/blue_saved_networks/checkpoint
- 7180639.f1/Supplementary Materials/code/blue_saved_networks/-dqn-1600.data-00000-of-00001
- 7180639.f1/Supplementary Materials/code/blue_saved_networks/-dqn-1600.index
- 7180639.f1/Supplementary Materials/code/blue_saved_networks/-dqn-1600.meta
- 7180639.f1/Supplementary Materials/code/blue_saved_networks/-dqn-1700.data-00000-of-00001
- 7180639.f1/Supplementary Materials/code/blue_saved_networks/-dqn-1700.index
- 7180639.f1/Supplementary Materials/code/blue_saved_networks/-dqn-1700.meta
- 7180639.f1/Supplementary Materials/code/blue_saved_networks/-dqn-1800.data-00000-of-00001
- 7180639.f1/Supplementary Materials/code/blue_saved_networks/-dqn-1800.index
- 7180639.f1/Supplementary Materials/code/blue_saved_networks/-dqn-1800.meta
- 7180639.f1/Supplementary Materials/code/blue_saved_networks/-dqn-1900.data-00000-of-00001
- 7180639.f1/Supplementary Materials/code/blue_saved_networks/-dqn-1900.index
- 7180639.f1/Supplementary Materials/code/blue_saved_networks/-dqn-1900.meta
- 7180639.f1/Supplementary Materials/code/blue_saved_networks/-dqn-2000.data-00000-of-00001
- 7180639.f1/Supplementary Materials/code/blue_saved_networks/-dqn-2000.index
- 7180639.f1/Supplementary Materials/code/blue_saved_networks/-dqn-2000.meta
- 7180639.f1/Supplementary Materials/code/Run_aircombat.py
