# Supplementary material for: Improving Maneuver Strategy in Air Combat by Alternate Freeze Games with a Deep Reinforcement Learning Algorithm
Source: Hindawi journal article supplement (doi:10.1155/2020/7180639), 2020-06-30
Supplement: f1 [file 7180639.f1.zip › 7180639.f1/Supplementary Materials/code/blue_saved_networks/checkpoint]

model_checkpoint_path: "-dqn-2000"
all_model_checkpoint_paths: "-dqn-1600"
all_model_checkpoint_paths: "-dqn-1700"
all_model_checkpoint_paths: "-dqn-1800"
all_model_checkpoint_paths: "-dqn-1900"
all_model_checkpoint_paths: "-dqn-2000"
